# Supplementary material for: The small molecule rhodomyrtone suppresses TNF-α and IL-17A-induced keratinocyte inflammatory responses: A potential new therapeutic for psoriasis
Source: PubMed Central journal article supplement (PMC6188632; doi:10.1371/journal.pone.0205340), 2018-10-15
Supplement: pone.0205340.s001.pdf [file pone.0205340.s001.pdf]

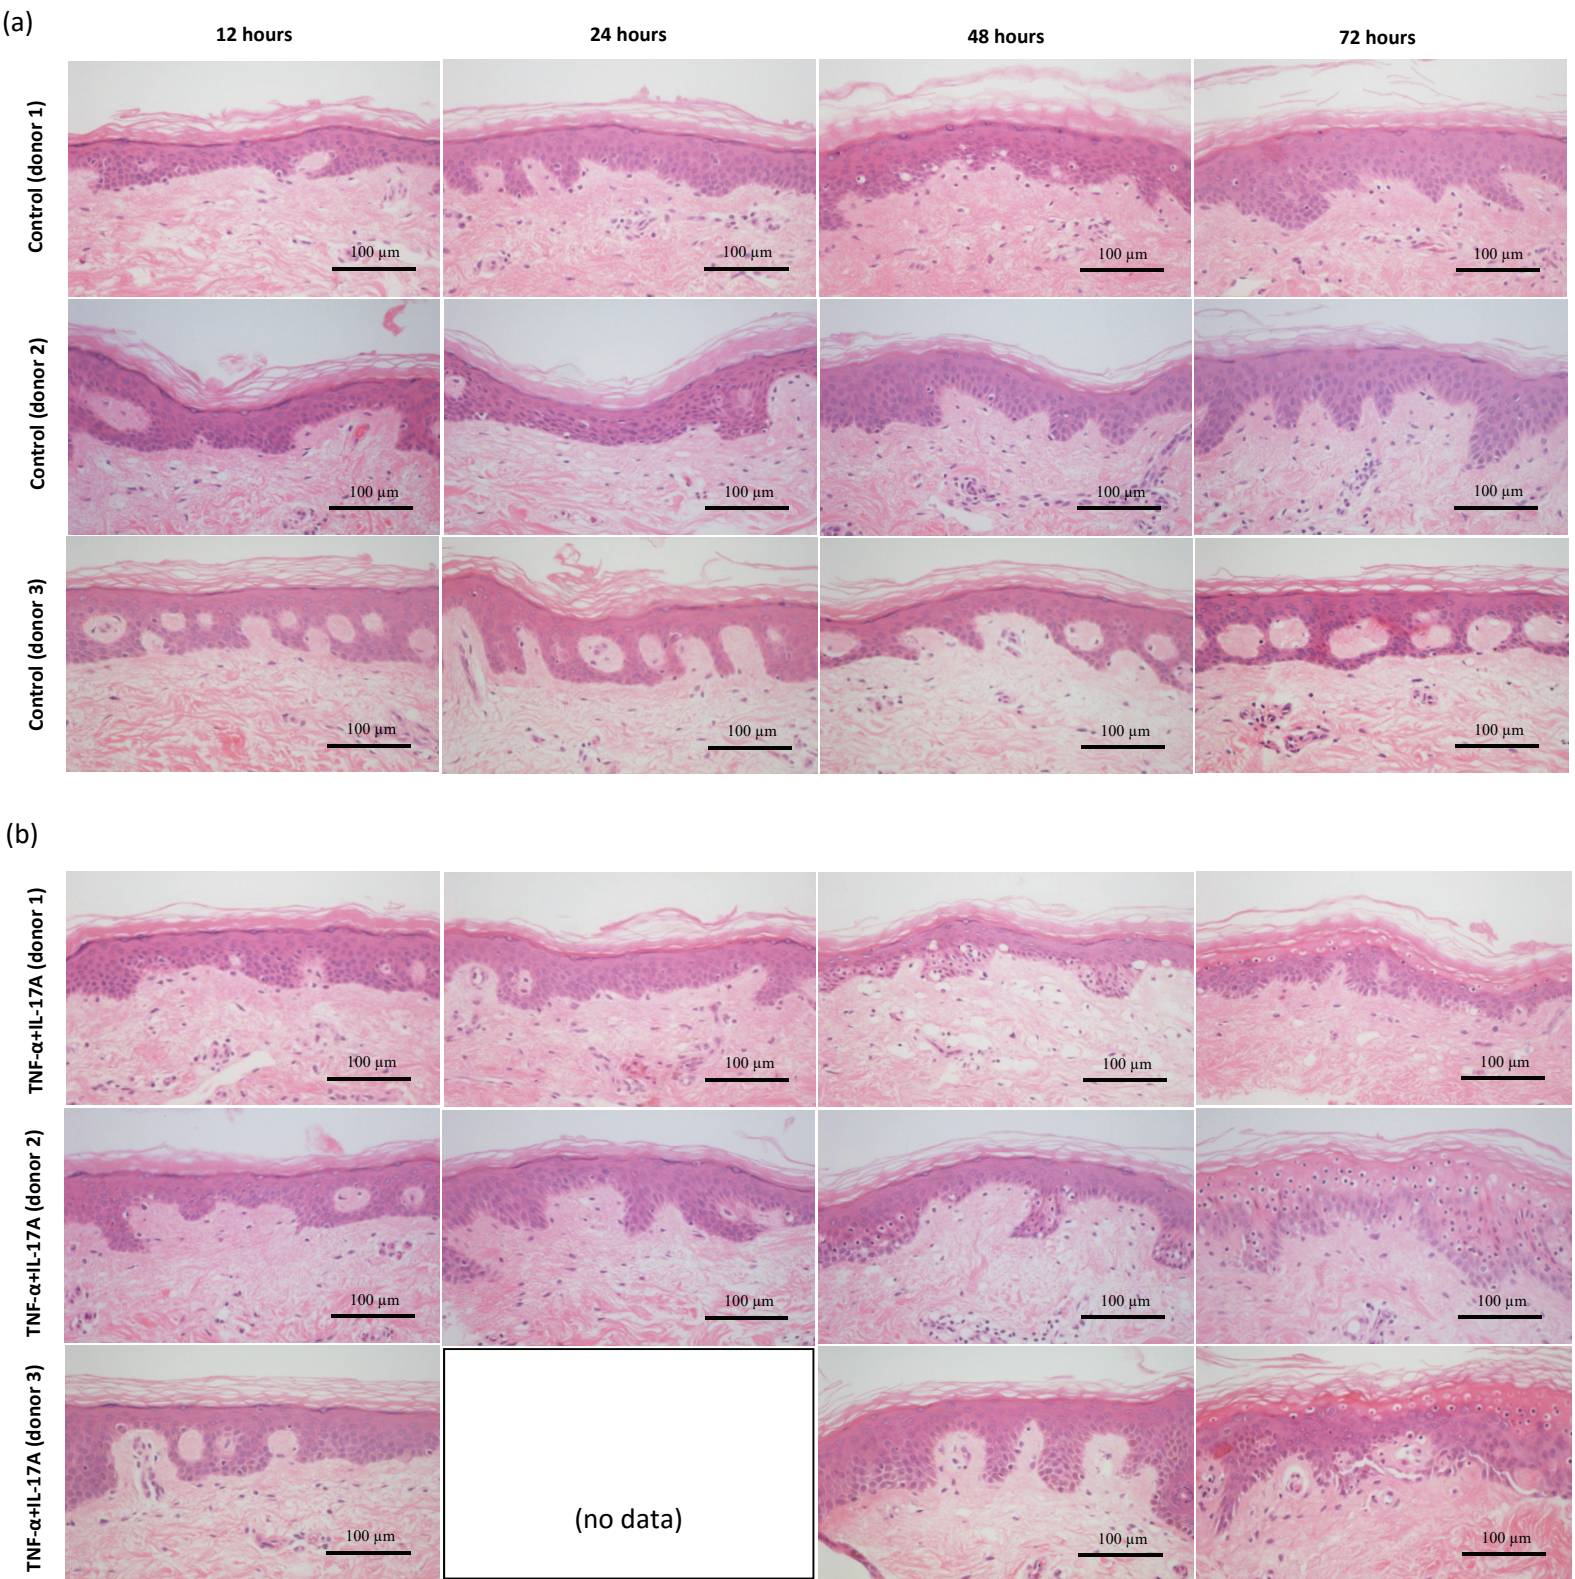

**Supplemental Figure 1: Histology of normal human skin organ cultures.** Unstimulated skin organ cultures (a), 10ng ml<sup>-1</sup> TNF + 20 ng ml<sup>-1</sup> IL-17A treated skin organ cultures (b). 12-72 hour time course, 3 healthy donors, Scale bar, 100  $\mu$ m.
