# Supplementary material for: The small molecule rhodomyrtone suppresses TNF-α and IL-17A-induced keratinocyte inflammatory responses: A potential new therapeutic for psoriasis
Source: PubMed Central journal article supplement (PMC6188632; doi:10.1371/journal.pone.0205340), 2018-10-15
Supplement: pone.0205340.s002.pdf [file pone.0205340.s002.pdf]

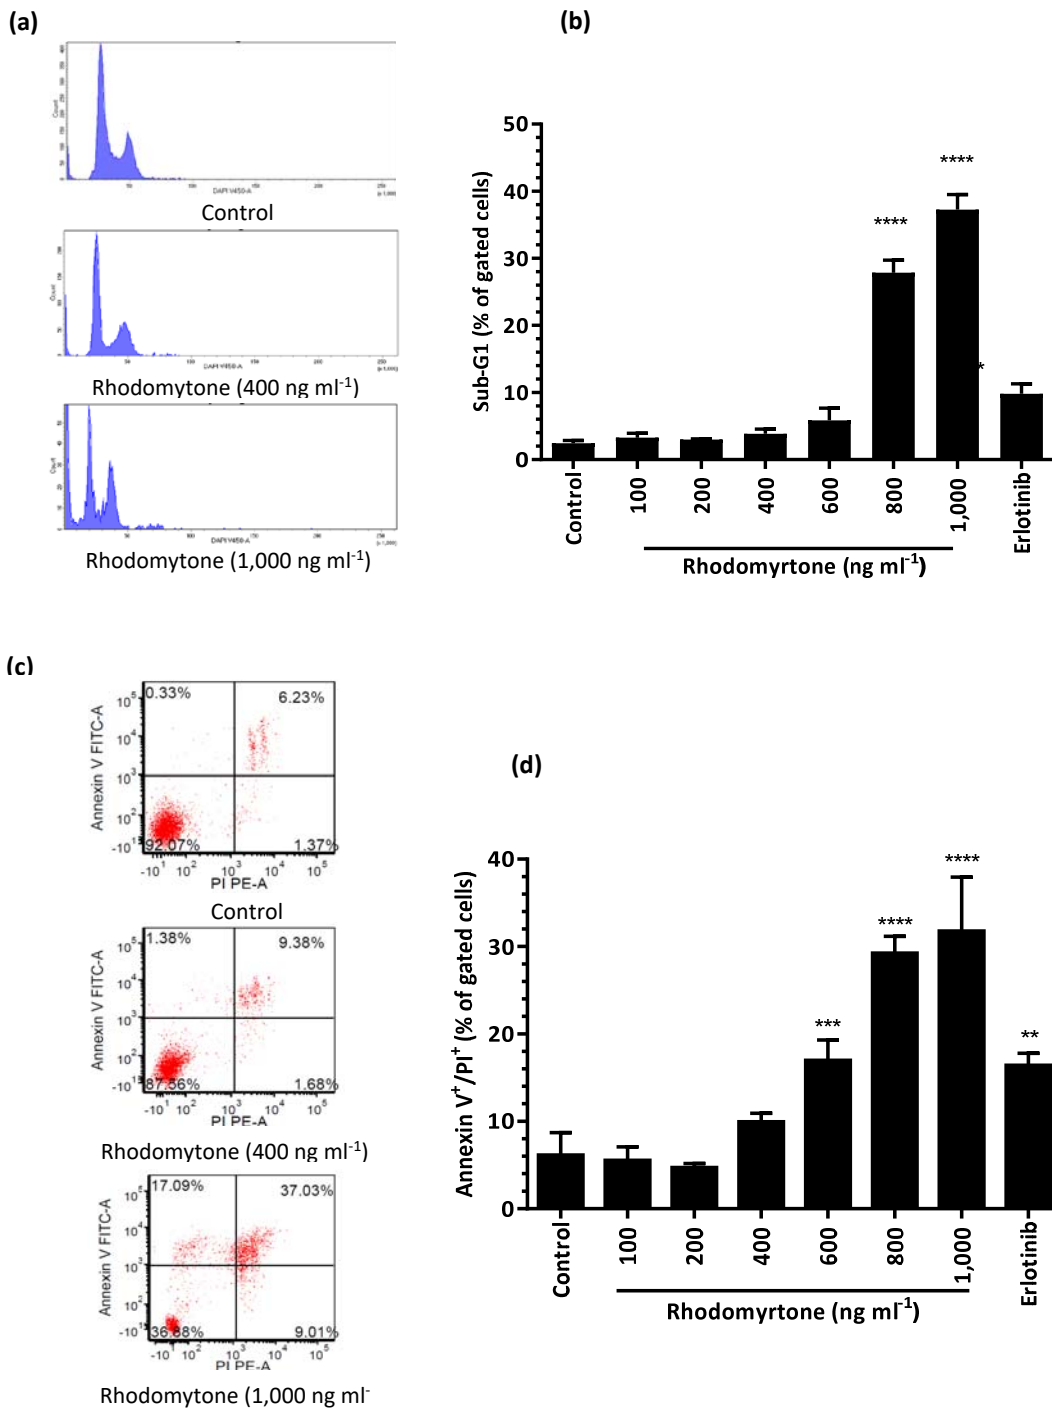

**Supplemental Figure 2: Rhodomyrtone toxicity is limited to high doses.** Cultures of primary normal human keratinocytes (NHK) were treated with the indicated concentrations of rhodomyrtone or 5 $\mu$ M erlotinib for 24 hours and the level of cell death assessed using 4',6-diamidino-2-phenylindole (DAPI) to identify the sub-G<sub>1</sub> cell cycle population (a and b) and annexin V-FITC and propidium iodide (PI) staining to identify apoptotic and necrotic cells (c and d) using flow cytometry. Treatment with the EGFR inhibitor erlotinib, a positive control for keratinocyte apoptosis<sup>45</sup>, increased the proportion of keratinocytes in the sub-G<sub>1</sub> (9.8%) as did treatment with 800 and 1,000 ng ml<sup>-1</sup> of rhodomyrtone (27.86% and 37.26%, respectively compared with 2.43% in control cultures); however, at concentrations of 600 ng ml<sup>-1</sup> and below, rhodomyrtone did not exhibit toxicity (a and b). This result was corroborated using annexin V and PI staining which showed that below 600 ng ml<sup>-1</sup>, rhodomyrtone did not induce keratinocyte apoptosis, however, cell death was evident at higher concentrations (c and d). Bar graphs, mean $\pm$ SD of results from three independent experiments in triplicate. Statistical significance determined using one-way ANOVA and Dunn's multiple comparison test and denoted \*\* p<0.01, \*\*\* p<0.001, \*\*\*\*, p<0.0001.
