# Supplementary material for: The small molecule rhodomyrtone suppresses TNF-α and IL-17A-induced keratinocyte inflammatory responses: A potential new therapeutic for psoriasis
Source: PubMed Central journal article supplement (PMC6188632; doi:10.1371/journal.pone.0205340), 2018-10-15
Supplement: pone.0205340.s003.pdf [file pone.0205340.s003.pdf]

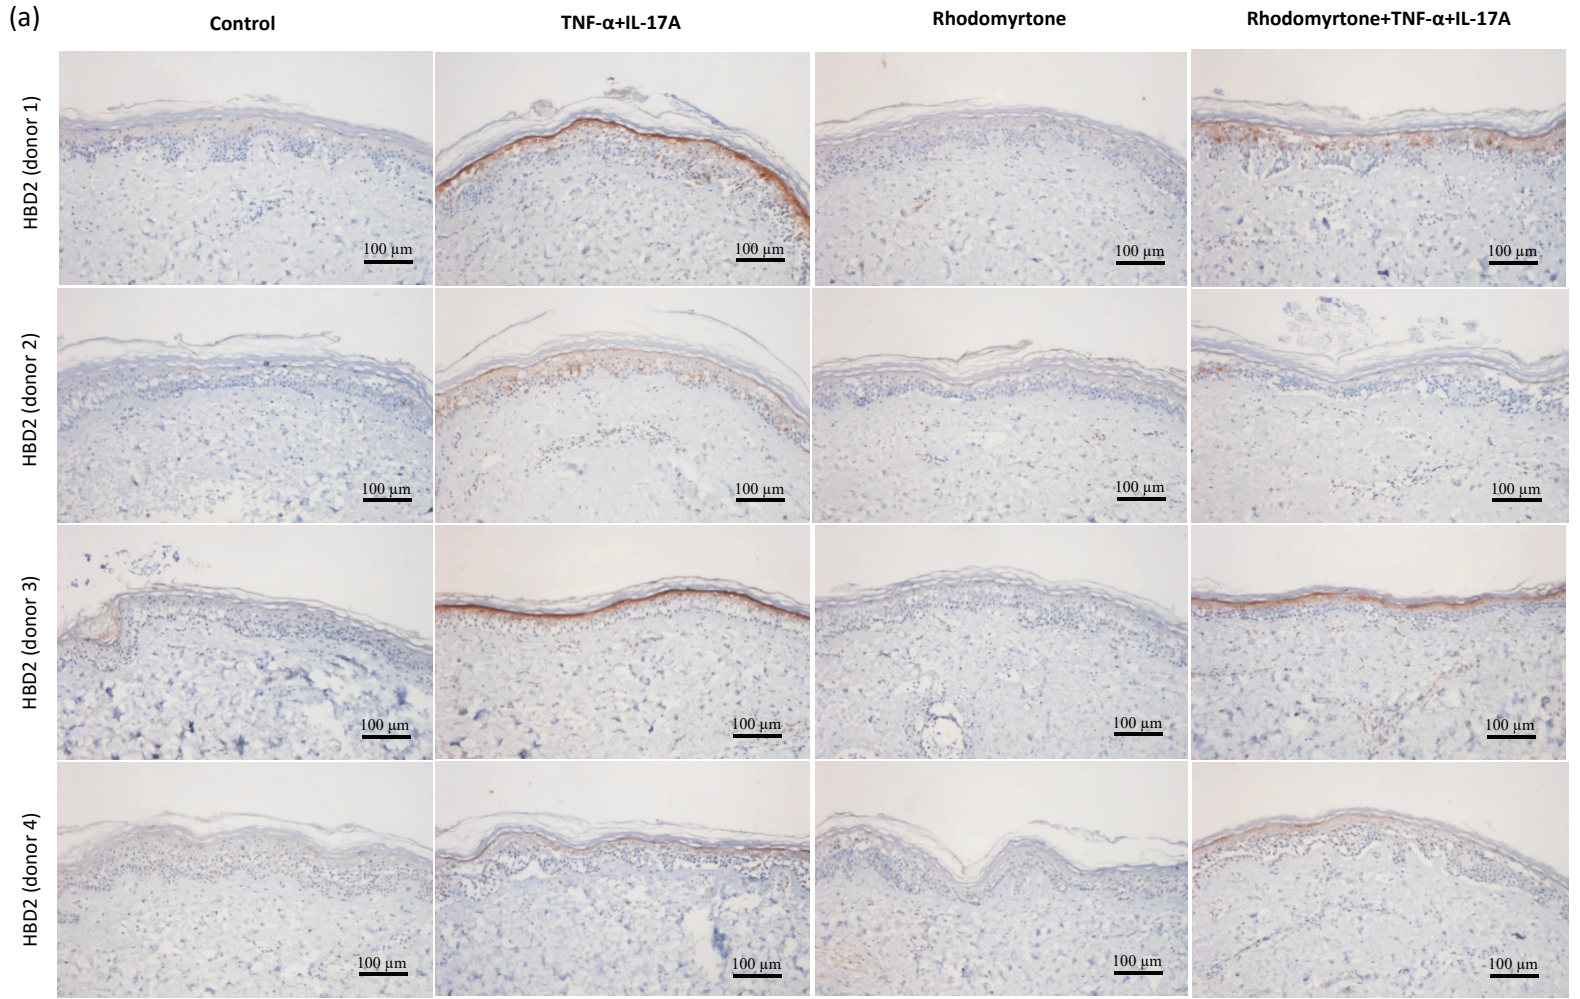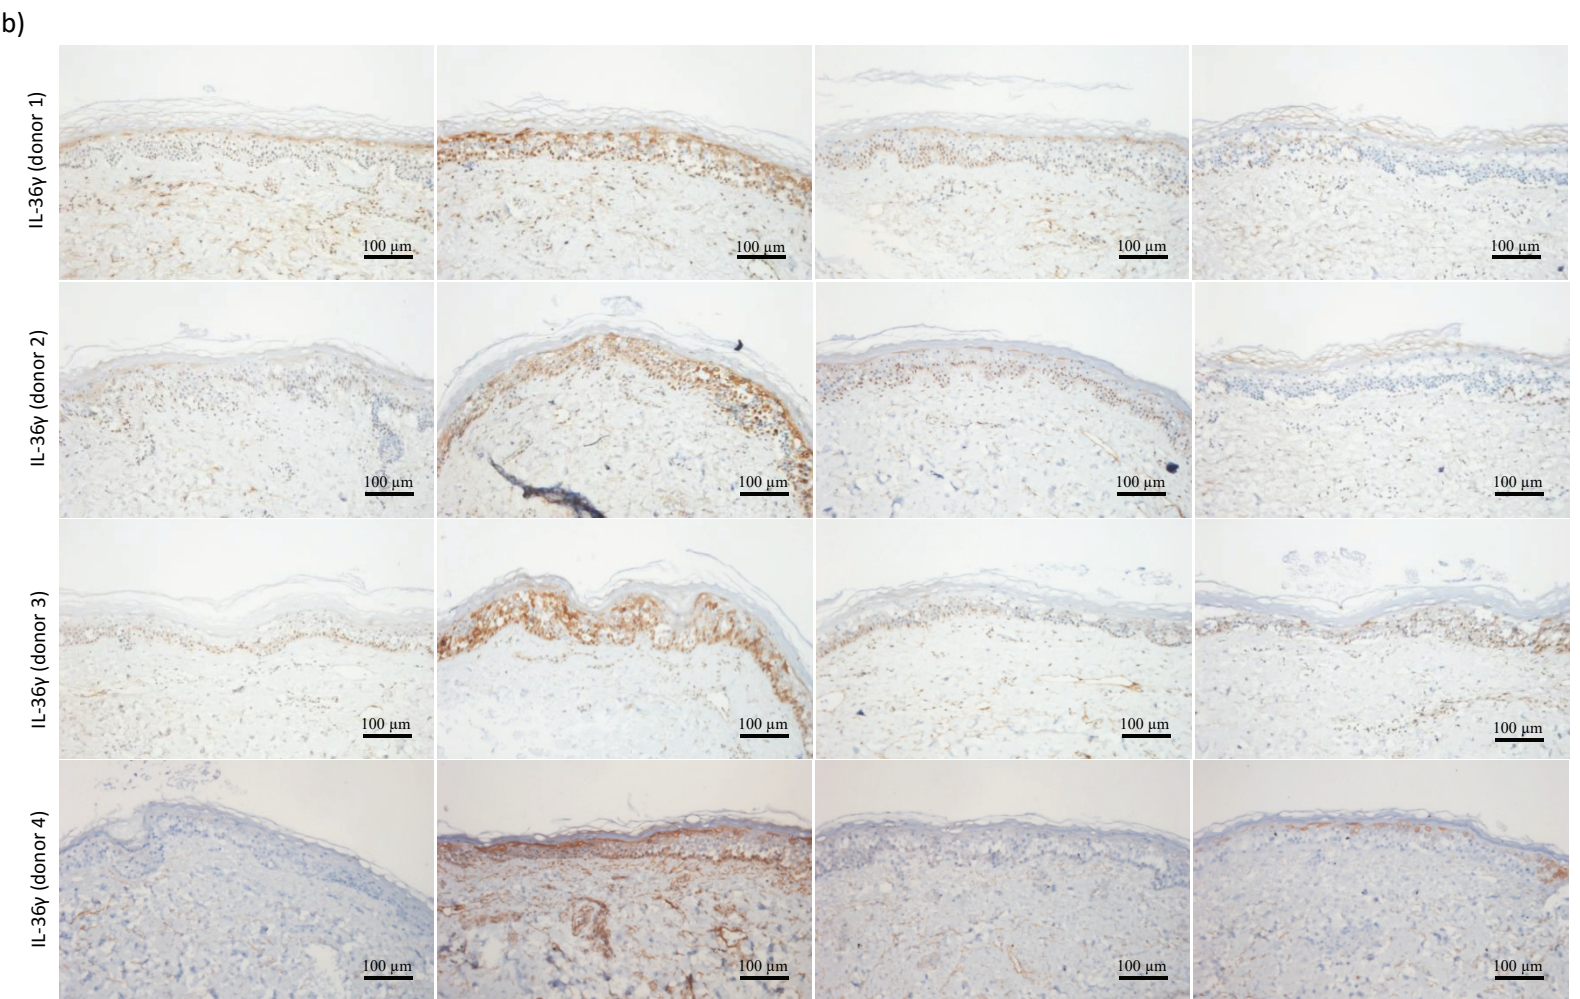



(c)

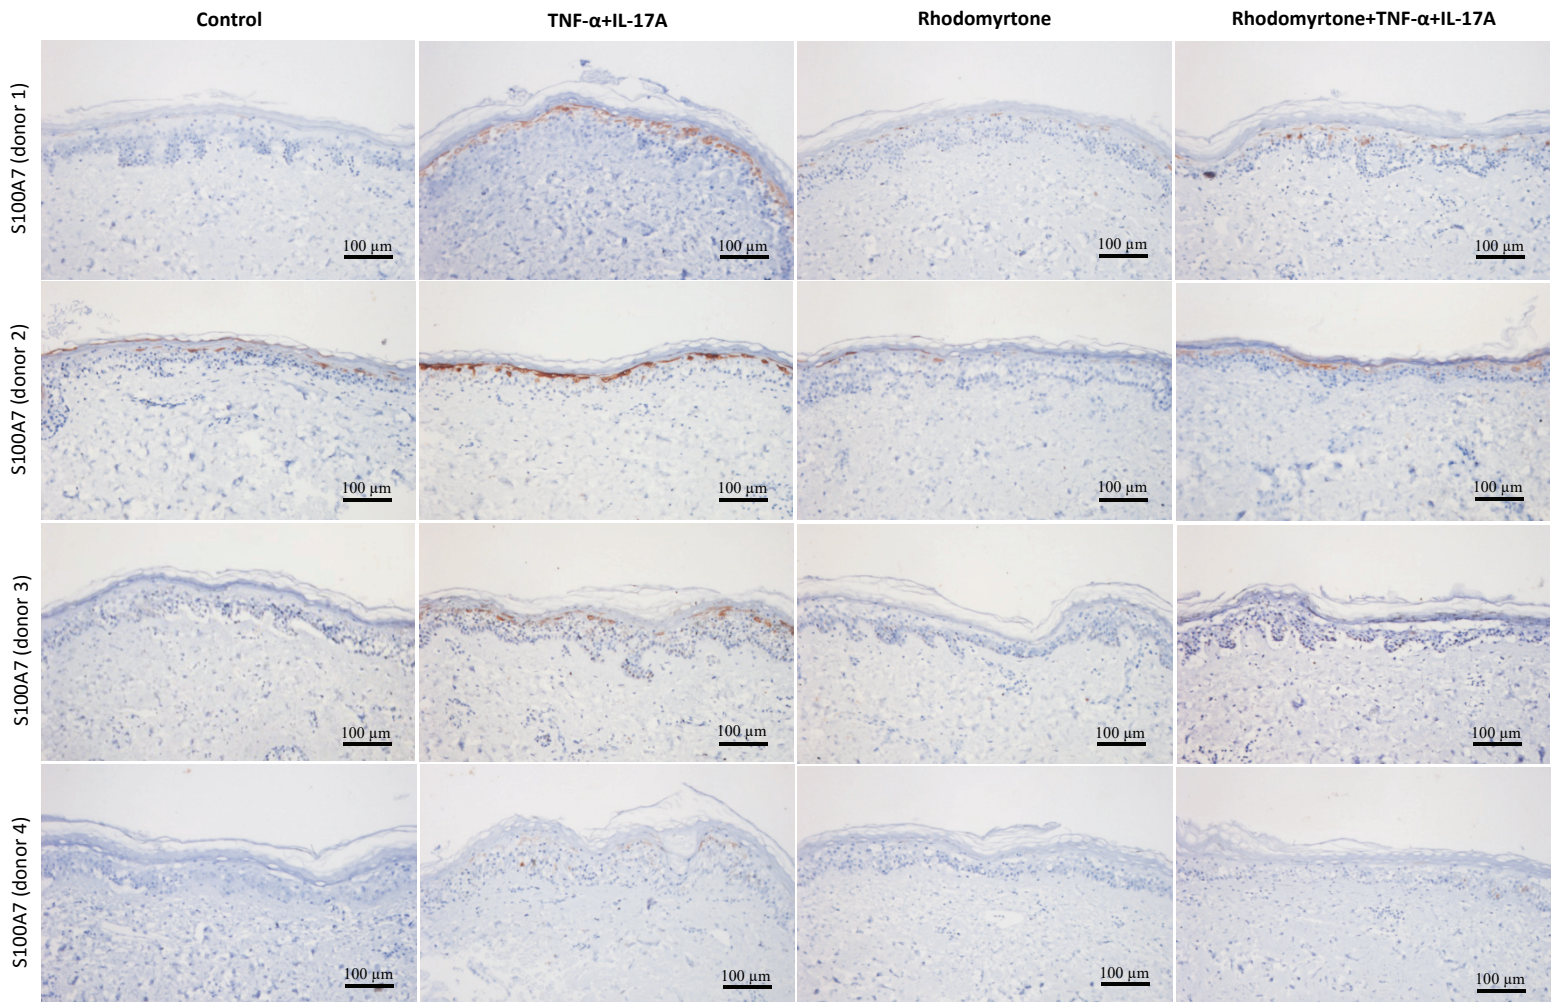

**Supplemental Figure 3: Rhodomyrtone inhibits TNF- $\alpha$ +IL-17A-induced inflammatory responses in skin organ cultures.** Cultures were pre-treated with 400ng ml<sup>-1</sup> rhodomyrtone for 6 hours before stimulation with 10ng ml<sup>-1</sup> TNF- $\alpha$  and 20ng ml<sup>-1</sup> IL-17A for 72 hours. Immuno-histochemical staining for HBD-2, IL-36 $\gamma$ , and S100A7 revealed prominent induction of HBD-2 (a), IL-36 $\gamma$  (b) and S100A7 (c) by TNF+IL17A treatment. Staining from 4 donors of 5 shown. Scale bar, 100  $\mu$ m.
