# Supplementary material for: The small molecule rhodomyrtone suppresses TNF-α and IL-17A-induced keratinocyte inflammatory responses: A potential new therapeutic for psoriasis
Source: PubMed Central journal article supplement (PMC6188632; doi:10.1371/journal.pone.0205340), 2018-10-15
Supplement: pone.0205340.s006.pdf [file pone.0205340.s006.pdf]

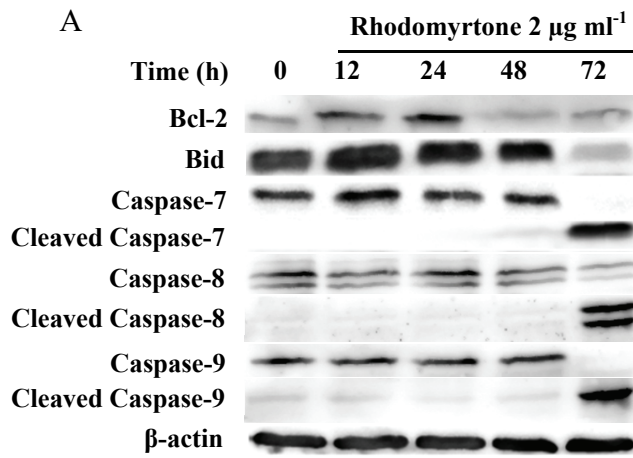

**B**

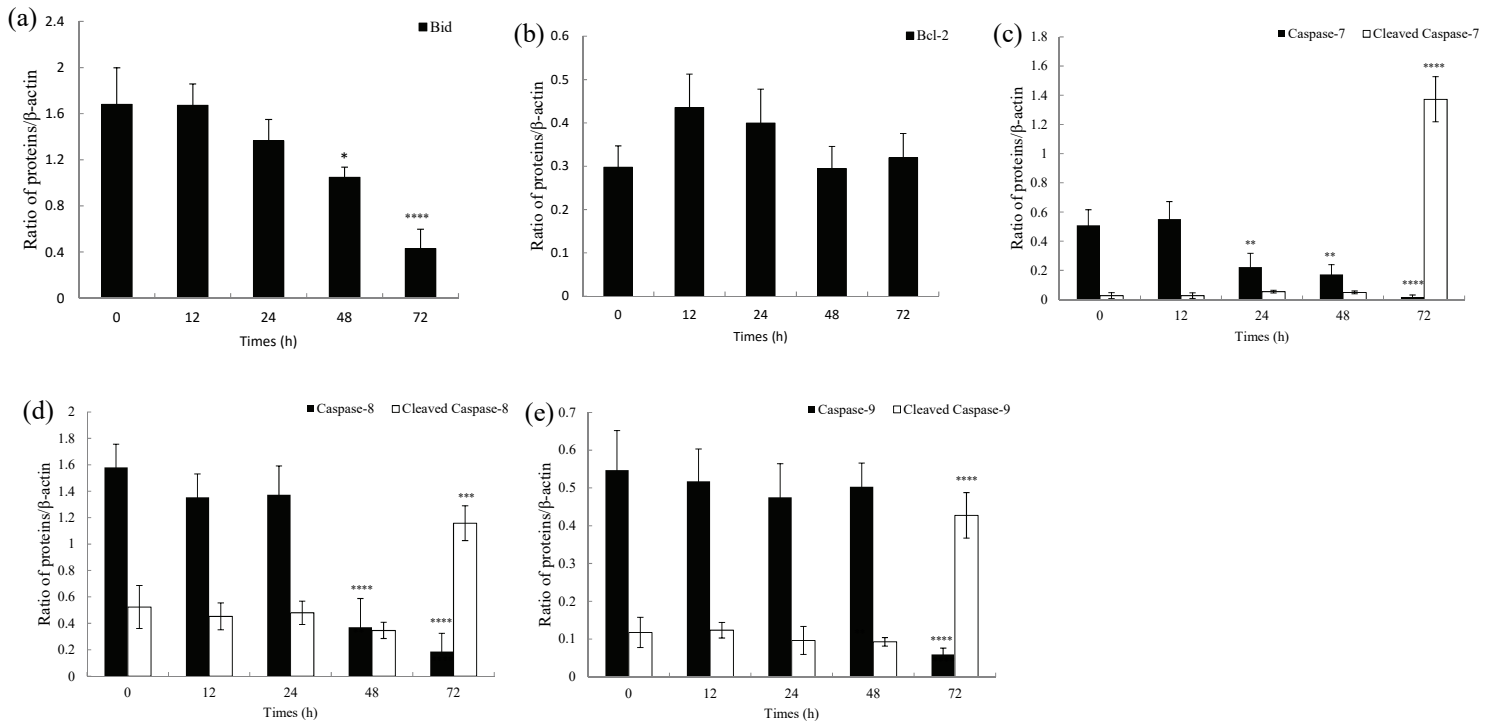

**Supplemental Figure 6: At high concentrations, rhodomlyrtone triggers activation of keratinocyte apoptosis.** HaCaT keratinocytes were treated with  $2\mu\text{g ml}^{-1}$  rhodomlyrtone for 0, 12, 24, 48, and 72 hours then total protein prepared. The effects of rhodomlyrtone on expression levels of apoptosis-associated proteins was assessed by western blot analyses using antibodies against Bcl-2, Bid, caspases-7, -8, and -9, and cleaved caspases-7, -8, and -9 (A). Bar graphs represent the ratio of each protein normalized to  $\beta$ -actin expression (B). Values shown are mean  $\pm$  SD of results from three independent experiments in triplicate. (\* $p < 0.05$ , \*\* $p < 0.01$ , \*\*\*\* $p < 0.0001$ , as compared with control).
