# Supplementary material for: The small molecule rhodomyrtone suppresses TNF-α and IL-17A-induced keratinocyte inflammatory responses: A potential new therapeutic for psoriasis
Source: PubMed Central journal article supplement (PMC6188632; doi:10.1371/journal.pone.0205340), 2018-10-15
Supplement: pone.0205340.s008.pdf [file pone.0205340.s008.pdf]

## SUPPLEMENTAL METHODS

### Apoptosis assay and cell-cycle analysis

Cells at a density of  $4 \times 10^4$  cells well<sup>-1</sup> were seeded into 12-well plates and incubated at 37°C for 24 hours. Rhodomyrtone (100-1,000 ng ml<sup>-1</sup>) was added for 24 hours, after which the adherent cells were washed twice with PBS, trypsinized, and collected by centrifugation at 200xg for 4 minutes at 4°C. Cells were fixed and permeabilized with 3 ml cold 70% ethanol at -20°C overnight before centrifugation at 1500xg for 10 minutes. After washing, the cell pellets were incubated with 0.5 ml of PIPES buffer (10 mM Tris, 0.1 M NaCl, 2 mM MgCl<sub>2</sub>, 0.1% Triton X-100, pH 6.8) and 1 µg ml<sup>-1</sup> DAPI at RT for 10 minutes. Cell cycle and sub-G<sub>1</sub> distributions were analyzed by measuring DNA content using an LSR2 flow cytometer (Beckton-Dickinson). A second fraction of cells was used for the quantification of apoptosis and necrosis using FITC-annexin V and propidium iodide staining, followed by flow cytometric analysis.
